# Supplementary material for: Generation and Characterization of Stable Small Colony Variants of USA300 Staphylococcus aureus in RAW 264.7 Murine Macrophages
Source: MDPI journal article supplement (doi:10.3390/antibiotics13030264), 2024-03-16
Supplement: s1 [file s1]

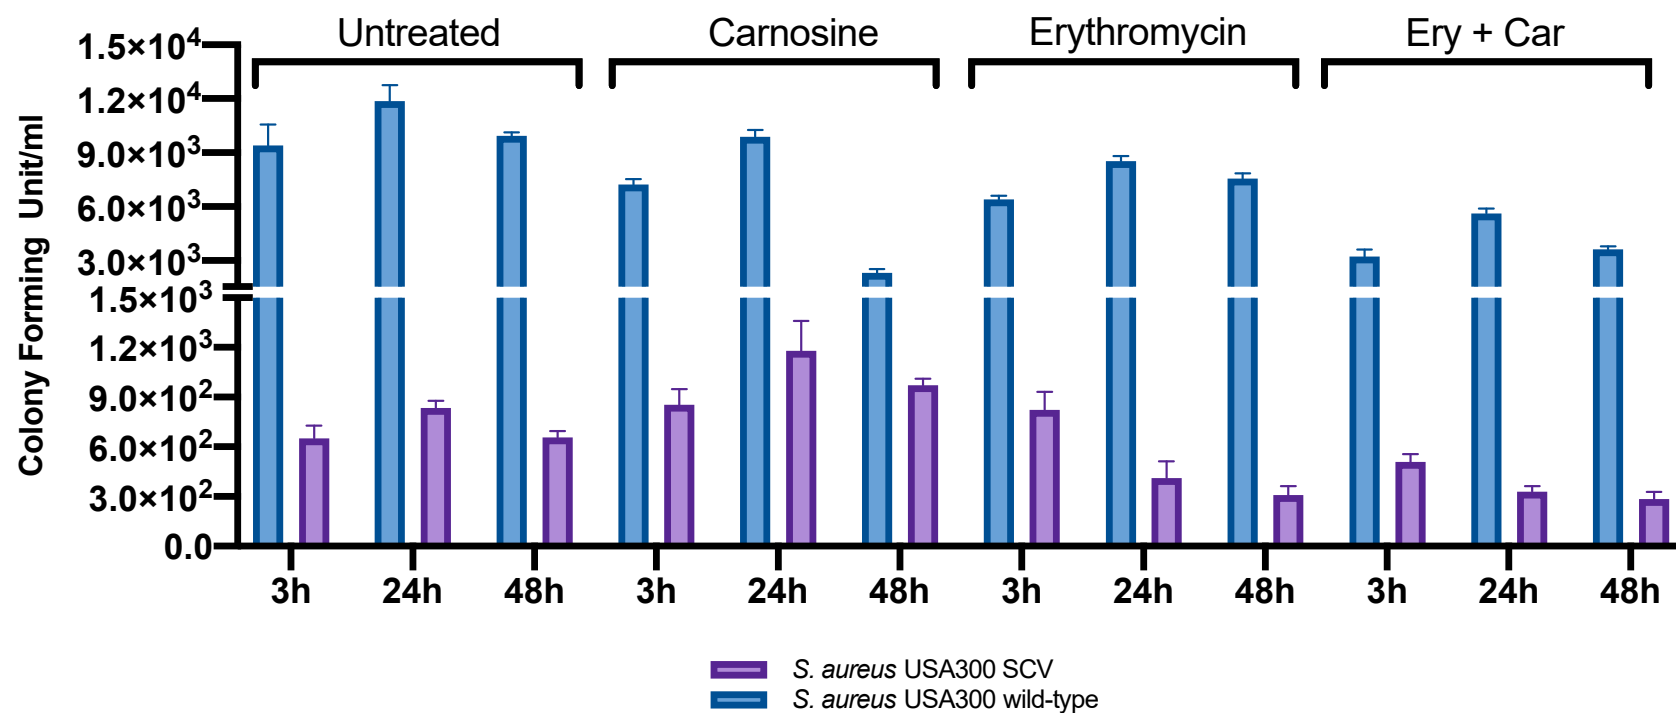

Figure S1: Colony count (CFU/ml) from all experimental conditions at 3, 24 and 48h p.i.

**Table S1:** Aminoglycoside MIC values of *S. aureus* ATCC BAA-1556\_Catania and its derivative SCVs

|            | USA 300  |         |
|------------|----------|---------|
|            | WT       | SCV     |
| AMIKACIN   | 4 mg/L   | 96 mg/L |
| GENTAMYCIN | 0.5 mg/L | 4 mg/L  |
| TOBRAMYCIN | 0.5 mg/L | 6 mg/L  |
| KANAMYCIN  | 1.5 mg/L | 16 mg/L |

**Table S2.** Resistance and virulence profiles of ATCC BAA-1556 *S. aureus* WT and its derivative stable SCV.

| <b>RESISTANCE AND VIRULENCE PROFILES</b> |                                                                                                                                                                                                                                                                                                                                                                                                                                                                                                                                                                                                                                                                                                                                                                                                                                                                                                                                                                                                                                                                                                                                                                                                                                                                                                                                                                                                                                                                                                                                                                                                                                                                                                                                                                                                                                                                                                                                                      |
|------------------------------------------|------------------------------------------------------------------------------------------------------------------------------------------------------------------------------------------------------------------------------------------------------------------------------------------------------------------------------------------------------------------------------------------------------------------------------------------------------------------------------------------------------------------------------------------------------------------------------------------------------------------------------------------------------------------------------------------------------------------------------------------------------------------------------------------------------------------------------------------------------------------------------------------------------------------------------------------------------------------------------------------------------------------------------------------------------------------------------------------------------------------------------------------------------------------------------------------------------------------------------------------------------------------------------------------------------------------------------------------------------------------------------------------------------------------------------------------------------------------------------------------------------------------------------------------------------------------------------------------------------------------------------------------------------------------------------------------------------------------------------------------------------------------------------------------------------------------------------------------------------------------------------------------------------------------------------------------------------|
| <b>Resistance genes</b>                  | <i>mecA</i> , gene encodes methicillin resistance in staphylococci; <i>fosB</i> , gene that leads to the resistance of fosfomycin; <i>mepA</i> , gene encodes MepA efflux pumps; <i>arlS</i> , protein histidine kinase for ArlR; <i>mepR</i> , gene for upstream repressor of MepA; <i>tetK</i> , gene encodes a tetracycline efflux pump; <i>ermC</i> , ribosomal RNA methyltransferase; <i>lmrS</i> , secondary active transporters; <i>arlR</i> , response regulator for <i>norA</i> ; <i>norA</i> , multidrug efflux pump; <i>tet38</i> , tetracycline efflux pump; <i>mepA</i> , gene for efflux pump protein; <i>mgrA</i> , regulator for <i>norA</i> , <i>norB</i> , and <i>tet38</i> . Virulence genes: <i>hla</i> , alpha-hemolysin; <i>hlgA</i> beta-hemolysin; <i>hld</i> , delta-lysin; gamma-hemolysin A; <i>hlgB</i> , gamma-hemolysin B; <i>hlgC</i> , gamma-hemolysin C; <i>aur</i> , aureolysin; <i>ebp</i> , elastin-binding protein; <i>IcaR-IcaA-IcaD-IcaB-IcaC-IsdB-IsdA-IsdC-IsdD</i> , iron metabolism and acquisition; <i>isdE-isdF</i> , heme metabolism <i>srtB</i> , <i>isdG</i> , <i>lip</i> , <i>geh</i> , <i>map</i> , <i>lukS/F PV</i> , Pantone Valentine leukocidin encoding factors; <i>scn</i> , staphylococcal complement inhibitor; <i>sdrD</i> , serine-aspartate repeat-containing protein D; <i>sdrE</i> , serine-aspartate repeat-containing protein E; <i>sspB</i> , staphylococcal serine-protease B; <i>sspC</i> , staphylococcal serine-protease C; <i>sak</i> , staphylokinase; <i>esxA</i> , staphylococcal protein secretion system A; <i>esxB</i> , staphylococcal protein secretion system B; <i>esaA</i> , staphylococcal secretion system component A; <i>essA</i> , staphylococcal secretion machinery protein A; <i>essB</i> , staphylococcal secretion machinery protein B; <i>essC</i> , staphylococcal secretion machinery protein C; <i>vWbp</i> , von Willebrand factor-binding protein. |
| <b>Virulence genes</b>                   | <i>hla</i> , alpha-hemolysin; <i>hlgA</i> , beta-hemolysin; <i>hld</i> , delta-lysin; gamma-hemolysin A; <i>hlgB</i> , gamma-hemolysin B; <i>hlgC</i> , gamma-hemolysin C; <i>aur</i> , aureolysin; <i>ebp</i> , elastin-binding protein; <i>IcaR-IcaA-IcaD-IcaB-IcaC-IsdB-IsdA-IsdC-IsdD</i> , iron metabolism and acquisition; <i>isdE-isdF</i> , heme metabolism <i>srtB</i> , <i>isdG</i> , <i>lip</i> , <i>geh</i> , <i>map</i> , <i>lukS/F PV</i> , Pantone Valentine leukocidin encoding factors; <i>scn</i> , staphylococcal complement inhibitor; <i>sdrD</i> , serine-aspartate repeat-containing protein D; <i>sdrE</i> , serine-aspartate repeat-containing protein E; <i>sspB</i> , staphylococcal serine-protease B; <i>sspC</i> , staphylococcal serine-protease C; <i>sak</i> , staphylokinase; <i>esxA</i> , staphylococcal protein secretion.                                                                                                                                                                                                                                                                                                                                                                                                                                                                                                                                                                                                                                                                                                                                                                                                                                                                                                                                                                                                                                                                                      |

**Table S3:** statistical insights of gene expression levels detected through qRT-PCR

| <i>S.aureus</i> USA300 Vs<br><i>S.aureus</i> SCV |             | Unpaired t test P<br>value | P value<br>summary | Significantly different (P < 0.05)? | 95% confidence<br>interval | R squared (eta<br>squared) |
|--------------------------------------------------|-------------|----------------------------|--------------------|-------------------------------------|----------------------------|----------------------------|
| Regulator                                        | <i>sarA</i> | 0,5214                     | ns                 | No                                  | -1,058 to 1,520            | 0,229                      |
|                                                  | <i>sigB</i> | 0,7005                     | ns                 | No                                  | -0,4126 to 0,5075          | 0,08971                    |
|                                                  | <i>agrA</i> | 0,1483                     | ns                 | No                                  | -2,962 to 9,757            | 0,7255                     |
| Virulence                                        | <i>psmA</i> | 0,844                      | ns                 | No                                  | -1,746 to 1,574            | 0,02434                    |
|                                                  | <i>hla</i>  | 0,0878                     | ns                 | No                                  | -0,9560 to 6,173           | 0,8321                     |
|                                                  | <i>hld</i>  | 0,097                      | ns                 | No                                  | -1,344 to 7,353            | 0,8155                     |
| Surface protein                                  | <i>sdrE</i> | 0,0459                     | *                  | Yes                                 | 0,07210 to 3,155           | 0,9103                     |
| Metabolic<br>Pathways<br>(TCA - Glycolysis)      | <i>pdhA</i> | 0,8241                     | ns                 | No                                  | -1,769 to 1,573            | 0,03093                    |
|                                                  | <i>fumC</i> | 0,3329                     | ns                 | No                                  | -0,9176 to 1,683           | 0,445                      |
|                                                  | <i>uhpt</i> | 0,0209                     | *                  | Yes                                 | 0,7451 to 3,307            | 0,9586                     |
